# Supplementary material for: Lipin 1 modulates mRNA splicing during fasting adaptation in liver
Source: JCI journal article supplement (doi:10.1172/jci.insight.150114), 2021-09-07
Supplement: sd1 [file 1]

You are being redirected.
